**Title:** Who does the fairness in health AI community represent?

**Authors:**

Philippines: 2  
Turkey: 3  
Canada: 2  
Brazil: 1  
US: 9  
Germany: 1  
Denmark: 2  
Peru: 1  
Lebanon: 1

Ethnicity:  
White: 3 (10)  
Asian: 5 (8)  
Black: 3 (3)  
Hispanic: 0 (1)

Gender:  
Male: 12  
Female: 10

Isabelle Rose I. Alberto (Philippines)  
[iialberto@up.edu.ph](mailto:iialberto@up.edu.ph)  
ORCID: 0000-0002-7206-4770  
University of the Philippines College of Medicine, Manila, Philippines

Nicole Rose I. Alberto (Philippines)  
[nialberto@up.edu.ph](mailto:nialberto@up.edu.ph)  
ORCID: 0000-0001-9166-8134  
University of the Philippines College of Medicine, Manila, Philippines

Yuksel Altinel (Turkey)  
[dryukselaltinel@gmail.com](mailto:dryukselaltinel@gmail.com)  
ORCID 0000-0003-0113-4839  
Bagcilar Research and Training Hospital, General Surgery Department, University of Health Sciences, Istanbul Turkiye

Sarah Blacker (Canada White)  
[sblacker@yorku.ca](mailto:sblacker@yorku.ca)  
ORCID 0000-0002-6146-8972  
Department of Social Science  
York University  
Toronto, Ontario, Canada

William Warr Binotti (Brazil)  
[wbinotti@tuftsmedicalcenter.org](mailto:wbinotti@tuftsmedicalcenter.org)  
ORCID 0000-0001-6761-8807  
New England Eye Center, Tufts Medical Center, Boston, MA, USA  
Department of Medicine, Carney Hospital, Boston, MA, USA

Leo Anthony Celi (US Asian)  
[lceli@mit.edu](mailto:lceli@mit.edu)

ORCID 0000-0001-6712-6626

Institute for Medical Engineering and Science, Massachusetts Institute of Technology, Cambridge, MA , USA

Department of Medicine, Beth Israel Deaconess Medical Center, Boston, MA, USA

Department of Biostatistics, Harvard T.H. Chan School of Public Health, Boston, MA, USA

Tiffany Chua (US Asian)

[tchua@dons.usfca.edu](mailto:tchua@dons.usfca.edu)

University of San Francisco, San Francisco, CA, USA

Amelia Fiske (Germany)

[a.fiske@tum.de](mailto:a.fiske@tum.de)

ORCID 0000-0001-7207-6897

Institute for History and Ethics in Medicine, School of Medicine, Technical University of Munich, Munich, Germany

Molly Griffin (US White)

[mgriffi8@bidmc.harvard.edu](mailto:mgriffi8@bidmc.harvard.edu)

ORCID: [0000-0002-1615-2645](https://orcid.org/0000-0002-1615-2645)

Department of Medicine, Beth Israel Deaconess Medical Center, Boston, MA, USA

Gulce Karaca (Turkey)

[gkaraca@mgh.harvard.edu](mailto:gkaraca@mgh.harvard.edu)

ORCID 0000-0001-5211-0680

Department of Medicine, Massachusetts General Hospital, Boston, MA, USA

Nkiruka Mokolo (US Black)

[nmokolo21@email.mmc.edu](mailto:nmokolo21@email.mmc.edu)

ORCID 0000-0002-6991-1828

Meharry Medical College School of Medicine Nashville, TN, USA

David Kojo N. Naawu (US Black)

[dnathan22@email.mmc.edu](mailto:dnathan22@email.mmc.edu)

ORCID: 0000-0002-0470-107X

Meharry Medical College School of Medicine, Nashville, TN, USA

Jonathan Patscheider (Denmark), Corresponding Author

[jpatscheider@truststamp.net](mailto:jpatscheider@truststamp.net)

ORCID 0000-0003-4413-8573

Trust Stamp Denmark, Copenhagen, Denmark

Anton Petushkov (US White)

[antonpet@umich.edu](mailto:antonpet@umich.edu)

ORCID 0000-0003-3661-236X

University of Michigan, Ann Arbor, MI, USA

Justin Quion (US Asian), Corresponding Author

[justinmicq@gmail.com](mailto:justinmicq@gmail.com)

ORCID 0009-0009-6844-3047

Charles Senteio (US Black)

[charles.senteio@rutgers.edu](mailto:charles.senteio@rutgers.edu)

ORCID: 0000-0002-0254-3127

Department of Library and Information Science

Rutgers University School of Communication and Information, New Brunswick, NJ, USA

Simon Taisbak (Denmark)  
ORCID 0009-0005-6264-2118  
Inviso by Devoteam  
[Simon.taisbak@devoteam.com](mailto:Simon.taisbak@devoteam.com)

İsmail Tirnova (Turkey)  
[tirnova77@gmail.com](mailto:tirnova77@gmail.com)  
ORCID: 0000-0003-4488-1607  
Department of General Surgery  
Başkent University School of Medicine, Istanbul, Turkey

Harumi Tokashiki (Peru)  
[harumi.tokashiki@tufts.edu](mailto:harumi.tokashiki@tufts.edu)  
ORCID 0000-0002-7307-1884  
Department of Medicine, Carney Hospital, Boston, MA, USA

Adrian Velasquez (US Asian)  
[adrian@sleepbetterclinic.com](mailto:adrian@sleepbetterclinic.com)  
ORCID 0000-0003-2700-467X  
Warren Alpert School of Medicine at Brown University, Providence, RI, USA  
Department of Medicine, Carney Hospital, Boston, MA, USA

Antonio Yaghy (Lebanon)  
[ayaghy@tuftsmedicalcenter.org](mailto:ayaghy@tuftsmedicalcenter.org)  
ORCID 0000-0002-5054-495X  
New England Eye Center, Boston, MA, USA

Keagan Yap (Canada Asian)  
[keaganyap@college.harvard.edu](mailto:keaganyap@college.harvard.edu)  
ORCID 0009-0002-4486-4516  
Harvard College, Cambridge, MA, USA

The authors contributed equally to the manuscript and are listed alphabetically.

1 **ABSTRACT**

2  
3 OBJECTIVE: Artificial intelligence (AI) and machine learning are central components of today's medical  
4 environment. The fairness of AI, i.e. the ability of AI to be free from bias, has repeatedly come into  
5 question. This study investigates the diversity of the members of academia whose scholarship poses  
6 questions about the fairness of AI.

7  
8 METHODS: The articles that combine the topics of fairness, artificial intelligence, and medicine were  
9 selected from Pubmed, Google Scholar, and Embase using keywords. Eligibility and data extraction from  
10 the articles were done manually and cross-checked by another author for accuracy. 375 articles were  
11 selected for further analysis, cleaned, and organized in Microsoft Excel; spatial diagrams were generated

12 using Public Tableau. Additional graphs were generated using Matplotlib and Seaborn. The linear and  
13 logistic regressions were analyzed using Python.

14

15 RESULTS: We identified 375 eligible publications, including research and review articles concerning AI  
16 and fairness in healthcare. When looking at the demographics of all authors, out of 1984, 794 were  
17 female, and 1190 were male. Out of 375 first authors, 155 (41.33%) were female, and 220 (58.67%) were  
18 male. For last authors 110 (31.16%) were female, and 243 (68.84%) were male. In regards to ethnicity,  
19 234 (62.40%) of the first authors were white, 103 (27.47%) were Asian, 24 (6.40%) were black, and 14  
20 (3.73%) were Hispanic. For the last authors, 234 (66.29%) were white, 96 (27.20%) were Asian, 12  
21 (3.40%) were black, and 11 (3.11%) were Hispanic. Most authors were from the USA, Canada, and the  
22 United Kingdom. The trend continued for the first and last authors of the articles. When looking at the  
23 general distribution, 1631 (82.2%) were based in high-income countries, 209 (10.5 %) were based in  
24 upper-middle-income countries, 135 (6.8%) were based in lower-middle-income countries, and 9 (0.5 %)  
25 were based in low-income countries.

26

27 CONCLUSIONS: Analysis of the bibliographic data revealed that there is an overrepresentation of white  
28 authors and male authors, especially in the roles of first and last author. The more male authors a paper  
29 had the more likely they were to be cited. Additionally, analysis showed that papers whose authors are  
30 based in higher-income countries were more likely to be cited more often and published in higher impact  
31 journals. These findings highlight the lack of diversity among the authors in the AI fairness community  
32 whose work gains the largest readership, potentially compromising the very impartiality that the AI  
33 fairness community is working towards.

34

35 KEYWORDS: artificial intelligence, fairness, health equity, healthcare disparity

36

37 **INTRODUCTION**

38

39 The fields of medicine and technology are undeniably intertwined; progress in one field often drives  
40 innovation in the other. It is no surprise that artificial intelligence (AI) is making headlines with its promise  
41 to inform or even automate clinical decision-making. However, the greatest impact this innovation has is  
42 not the language models trained on billions of parameters nor the generative models that create images  
43 from text prompts. Rather, complex bias exists within the data and it takes form in various ways, ranging  
44 from outcomes that are inconsistent across demographics, to subconsciously tainted tests and treatment  
45 decisions, and to influencing local clinical practice patterns in the form of institutional bias. [1]

46  
47 Fairness is considered a critical element of trustworthy AI [2]. The fairness in health AI movement gained  
48 increasing momentum in the United States following an article by ProPublica, an independent nonprofit  
49 news organization focusing on accountability, justice, and safety, revealed that a software used by judicial  
50 courts across the US was discriminating against Black and Hispanic prisoners during parole hearings [3].  
51 Definitions of fairness and metrics to evaluate fairness in medical algorithms subsequently mushroomed  
52 in the medical literature. Yet criteria of fairness also extend beyond the algorithms themselves to the  
53 people involved in their creation as flawed data alone does not account for the bias found within  
54 algorithms. It is also important to consider the bias woven into the very fabric of the algorithm itself that  
55 reflects the human assumptions of those who created it. This is a problem of representation and  
56 exclusion, and of epistemic narrowing that can lead to the perpetuation of structural inequities. Through  
57 her concept of “strong objectivity,” the Science and Technology Studies scholar Sandra Harding has  
58 shown that the exclusion of marginalized authors, including People of Color, scholars based in low-  
59 income countries, and women, among others, from research and publishing is not only unjust, but also  
60 diminishes the scientific knowledge produced. In order to attain a stronger version of scientific objectivity,  
61 and to create a science that can work towards equity and justice, Harding argues that we need to fortify  
62 that science by increasing the diversity of academic authorship as much as possible [4]. Which leads to  
63 the crux of the matter: how diverse is the fairness of the AI community proposing these definitions and  
64 metrics of fairness? It is important to bring attention to the diversity, or lack thereof, within this community  
65 to help prevent future propagation of bias and promote equity in health care.

66

67 **METHODS**

68

69 **Search Strategy**

70

71 In order to analyze the AI fairness community in healthcare, an in-depth descriptive study was done  
72 measuring aspects related to the publications in the field with a bibliometric review. The AI field was  
73 defined with terms that included machine learning, deep learning, convolution neural network, and natural  
74 language processing. Fairness overlapped in terms of health equity and health disparities.

75 The combination of searches from PubMed, Google Scholar, and Embase yielded results that spanned  
76 31 years (1991-2022). The collected data were manually curated to secure the field of interest.

77

78 The search was conducted with the help of librarian Paul Bain, Ph.D., MLIS, from Harvard Medical  
79 School's Countway Library [Appendix].

80

81 **Eligibility of articles**

82

83 Studies were considered eligible for inclusion if they met the following criteria: (i) Does the paper discuss  
84 machine learning fairness? (ii) Is the paper related to healthcare?, and (iii) does it discuss clinical  
85 applications?

86

87 If the three questions were affirmative, then the article was eligible. If a paper's eligibility was still  
88 uncertain, it was cross-checked by another author.

89

90 **Data Items**

91

92 The bibliometric data obtained from Embase, PubMed, and Google Scholar provided the authors' first and  
93 last names, gender, race, article title, abstract, keywords, and URL. The articles were manually vetted to  
94 obtain enough bibliometric data and to ensure a thorough mapping and measurement of academic

95 trends. For each eligible study, the following data were extracted: type of article - opinion or research,  
96 which country the paper originated from, the journal it was published in, publication year, number of times  
97 each article was cited, whether or not funding was provided, and the name of the funding organization if  
98 provided. Additionally, the originating countries were classified based on the World bank classification for  
99 income to the following: low-income (<1.045 USD per year), lower-middle-income (1.046-4.095 USD per  
100 year), upper-middle income (4.096-12.695 USD per year), and high income (>12.695 USD per year) (cf.  
101 GDP per capita (current US\$) | Data (worldbank.org)) [5].

102

103 **Approach to identifying each author's nationality, race, and sex (Joanthan to add few lines about**  
104 **method in cases of determining ethnicity and gender)**

105

106 To ensure consistency in our dataset and perform statistical analysis, we used pre-defined groups  
107 provided by search platforms to classify the gender and race/ethnicity of authors. Race and ethnicity was  
108 classified as White, Asian, Black, Hispanic, or 'none', by the search platforms, while Gender was recorded  
109 as male, female or none.

110

111 When collecting data on the author's gender, race, and ethnicity, the study relied on a variety of sources,  
112 including self-identification in terms of ethnicity and race, and the author's chosen pronouns. If this  
113 information was not available, information found on web pages and articles, and details related to the  
114 authors' affiliations or memberships in social or support groups, was used to determine gender, ethnicity  
115 and race. If this information was still unclear, the authors' gender, race, and ethnicity were determined  
116 based on photographs found on multiple websites including, university websites, private web pages,  
117 YouTube, and social media platforms such as LinkedIn. To maintain the accuracy and validity of the data,  
118 the study cross-checked every authors' gender, race, and ethnicity, against multiple sources of  
119 information, and in addition, each article and its inherent information were verified by another author of  
120 the paper to ensure the validity, consistency, and accuracy in the data collection process. When collecting  
121 data on the authors' countries of origin, the study went back as far as possible on the authors' past,

122 reviewing information available on LinkedIn or faculty and research web pages. If the authors did not  
123 disclose their home country, the study considered the country of their furthest educational background.

124  
125 Lastly, the income level of the author's country of origin (cf. GDP per capita (current US\$) | data  
126 (worldbank.org)) [3] their affiliated institution, and whether it is a minority-serving institution (cf. MSI List  
127 2021.pdf (rutgers.edu), and their highest academic degree obtained (MD, Ph.D., etc.) [6] were  
128 investigated. To confirm the statistical certainty of the paper, the accuracy of the author's review of race,  
129 ethnicity, gender, country of origin, income level, etc. for each article's datapoint was verified multiple  
130 times by other authors involved in the study.

131  
132 The approach used to identify race, ethnicity, and gender has its limitations. When analyzing the  
133 bibliometric data, the collected information on the author's race, ethnicity, and gender was found to be  
134 unreliable and inconsistent, which reflects the inherent complexity of the topic at hand. Not all of the  
135 websites used as sources in this study allowed for authors to state their own identity. As a result, not all  
136 information was equally accessible via web searches. Authors who identified as multiracial, nonbinary, or  
137 other situations where the data was unclear, were not included, as the pre-defined groups provided by  
138 search platforms did not account for this. Moreover, the social constructs that can vary significantly  
139 depending on their socio-political context, gender, ethnicity and race, cannot and should not be directly  
140 determined from a picture. This means that in some cases, the information found may not completely  
141 reflect the author's preferred identities, which highlights some of the methodological challenges and the  
142 complexities of this kind of intersectional demographic data gathering, and the difficulty of analyzing data  
143 regarding race, ethnicity, and gender on a large scale with quantitative methods

144  
145 Nonetheless, this approach was chosen, because such determinations are difficult to make without  
146 engaging with a more in-depth survey of all authors in order to accurately record their preferred race,  
147 ethnicity, and gender.

148



149 Research on diversity requires a high level of reflexivity, including reflecting on one’s own positionality in  
150 relation to matters of fairness in research. As such, we would like to situate ourselves in relation to this  
151 scholarship. Among the authors on this paper, 12 identify as male and 10 identify as female and 0 identify  
152 as non-binary. In terms of ethnicity, 10 authors identify as White, 8 identify as Asian, 3, identify as Black  
153 and 1 identifies as Hispanic. The authors come from the

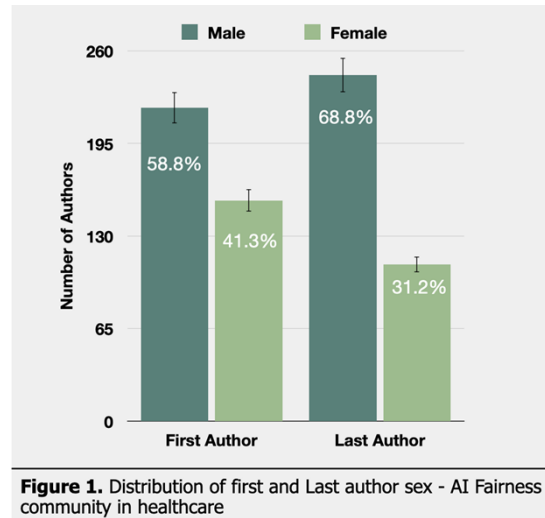

154 following countries of origin: USA (9), Turkey (2), Philippines (2), Canada(2), Denmark (2), Germany (1),  
155 Brazil(1), Lebanon(1), Peru (1). The idea for this research was inspired by conversations we have had  
156 with others in the field on matters of race, gender, and representation within AI and academia, and our  
157 own experiences of relative privileges working within this system.

158

### 159 **Statistical Analysis**

160

161 Regression analyses were performed to evaluate multiple factors that influence the number of citations  
162 and the presence of funding during the study. Only papers identified as research papers were included in  
163 this analysis as opinion pieces generally have little direct funding nor are widely cited beyond the  
164 community.

165

### 166 **RESULTS**

167

168 Bibliographic data was directly obtained from Embase, which yielded 242 articles. Data from the PubMed  
169 API yielded a total of 875 articles. Finally, another 497 articles from Google Scholar were found using the  
170 package PyPaperBot 1.2.2 [7] in Python 3.9.12. In  
171 total, 1614 articles potentially related to AI fairness were  
172 collected.

173  
174 Data was cleaned in Microsoft Excel. Spatial diagrams  
175 were generated using Public Tableau. Additional graphs  
176 were generated using Matplotlib 3.5.1 [8] and Seaborn

177 0.11.2 [9]. The linear and logistic regressions were analyzed using the Python package statsmodels  
178 0.13.2,  
179 and the t-tests were analyzed using the Python package scipy 1.7.3.

180  
181 As scope of the analysis was to map the gender and ethnic representation in the community of AI fairness  
182 within healthcare, scientific and non-scientific articles were screened for eligibility. The authors used  
183 manual vetting to narrow down the list of articles by reading the abstracts or full texts when the abstracts  
184 did not provide enough information. Out of the 1614 articles initially found through the search, 375 (23%)  
185 were determined to be eligible for further analysis, with a total number of authors of 1984.

### 186 187 **Distribution of each author's ethnicity and gender**

188  
189 The results showed that, overall, 794 (40.0 %) of the authors were female, and 1190 (60%) were male  
190 (Table 1; Appendix). When looking specifically at the first and last authors, 155 (41.3 %) of the first  
191 authors were female, and 110 (32.2 %) of the last authors were female (Figure 1).

192  
193 When the author's race distribution was analyzed, the study categorized the race of 1966 authors out of  
194 the total of 1984 authors in our curated database. The study found that the majority of the authors were

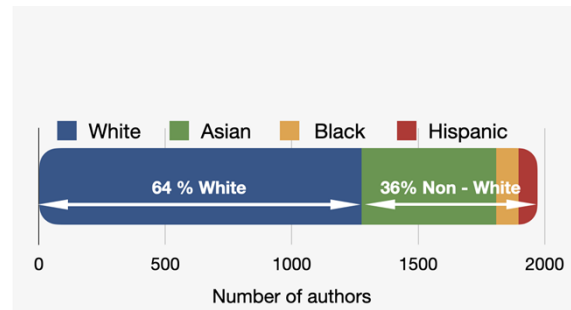

**Figure 2.** Distribution of First, Last and all Authors race - AI Fairness community in healthcare

195 White (1270; 64.0%), followed by Asian (533; 26.9%), Black (89; 4.5%), and Hispanic (74; 3.7%) (Figure  
196 2).

197

198 When dividing the authors into two groups, whites and non-whites, the study found that among the first  
199 authors, 234 (62.4%) were white and 141 (37.6%) were non-white. Among the last authors, 251 (66.9 %)  
200 were white, and 124 (33.1 %) were non-white (Table 1).

201

### 202 **Distribution of each nationality**

203

204 When looking at the country of origin, it was clear that most articles were from the USA. The total author  
205 nationality distribution showed that 986 (49.7%) were from the USA, 142 (7.2 %) were from Canada, 117  
206 (5.9 %) were from the UK, 115 (5.8 %) were from China, and 83 (4.2 %) were from India (Figure 3). From  
207 income levels, 1631 authors (82.2%) were from high-income countries, 209 (10.5 %) were from upper-  
208 middle-income countries, 135 (6.8%) were from lower-middle-income countries, and 9 (0.5 %) were from  
209 low-income countries.

210

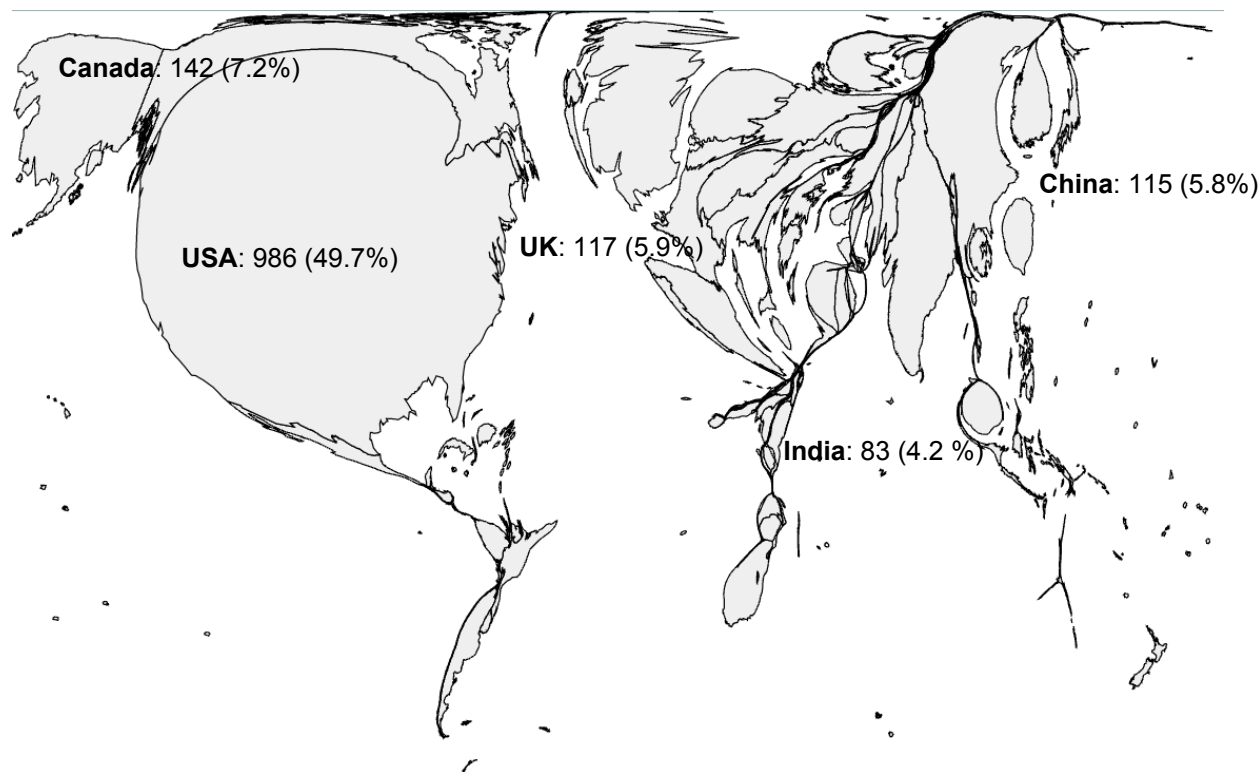

211

**Figure 3.** Distribution of each nationality– AI fairness community in Healthcare

212

213 When looking at the 375 first authors, 175 (46.7 %) were from the USA, 27 (7.2 %) were from Canada, 22  
214 (5.9 %) were from the UK, and 21 (5.60 %) were from China (Figure 4, A). Among the last authors, 179  
215 (50.7 %) were from the USA, 29 (8.2 %) were from Canada, 20 (5.7 %) were from the UK, and 14 (4.0%)  
216 were from China (Figure 4, A). For the first authors, 318 (84.8%) were from high-income countries, 32  
217 (8.5 %) were from upper-middle-income countries, 24 (6.4 %) were from lower-middle-income countries,  
218 and 1 (0.3 %) were from low-income countries. For the last authors, 312 (88.4 %) were from high-income  
219 countries, 27 (6.8 %) were from upper-middle-income countries, 15 (4.2 %) were from lower-middle-  
220 income countries, and 2 (0.6 %) were from low-income countries (Figure 4, B).

Figure 4A, Global Dispersion of First Author Countries

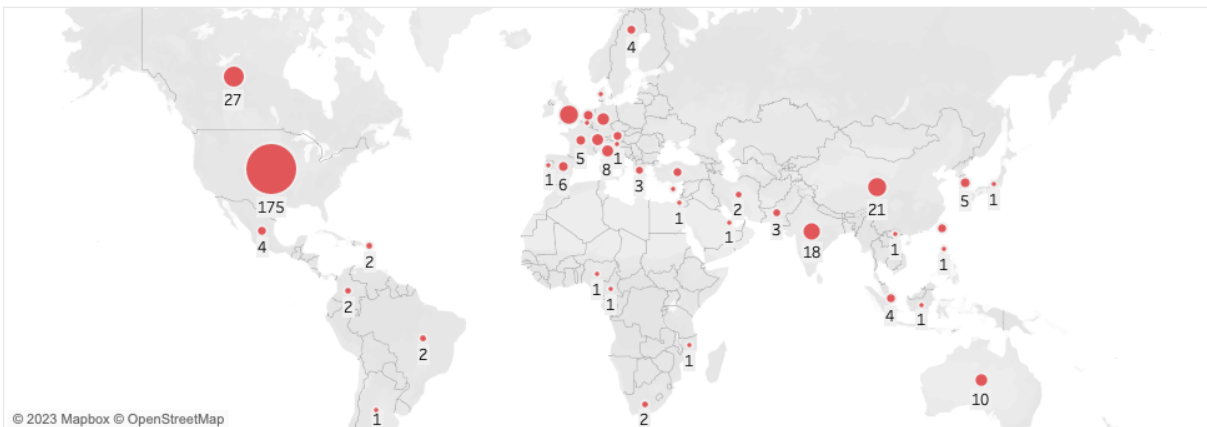

Figure 4B, Global Dispersion of Last Author Countries

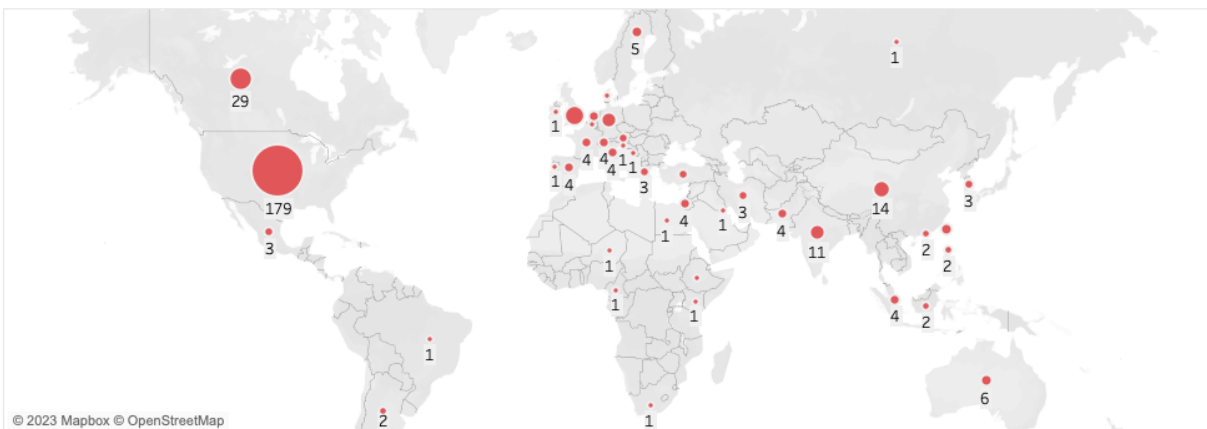

221

222

223

224

**Figure 4.** Global Dispersion of first (A) and last (B) author's nationality– AI fairness community in Healthcare

**Citations and Funding:**

225

226 By investigating citations across  
 227 gender and ethnicity, it was observed  
 228 that there was an overrepresentation  
 229 of white-male authors. The data  
 230 indicates, as illustrated in Figure 5,  
 231 that papers with more male and white  
 232 authors tended to receive more  
 233 citations than those with fewer male  
 234 and white authors.

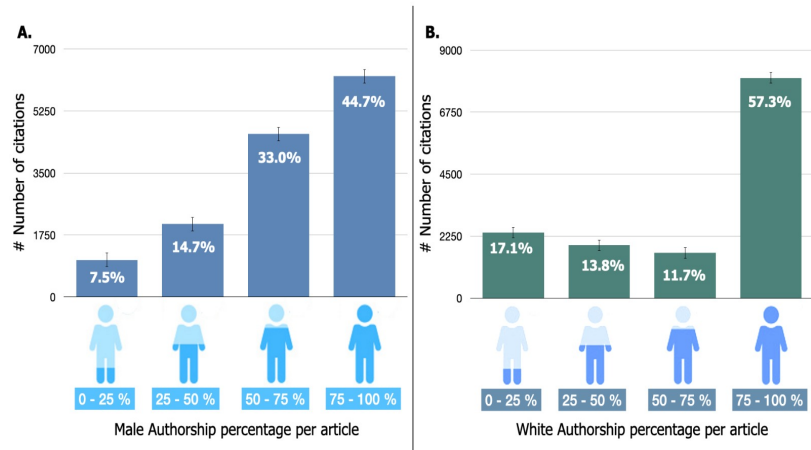

Figure 5. A. Distribution of Male authorship percentage per article with Number of citations and percentage - AI Fairness community in healthcare.  
 B. Distribution of White authorship percentage per article with Number of citations and percentage - AI Fairness community in healthcare

235

236 On further investigation, it became evident that on average for both first and last authors, non-white and  
 237 female authors receive fewer citations than white male authors, which is illustrated for last authors in  
 238 Figure 6.

239 From here, the data revealed that articles with male last authors accounted for a substantial 76.4% of all  
 240 citations, with white male last authors alone responsible  
 241 for 58.3% of the total citations for all articles (Figure 6).

242

243 The findings from Figure 5 and Figure 6, prompts the  
 244 argument that male authorship, particularly that of white  
 245 males, may be associated with higher-impact articles  
 246 published in high-impact journals.

247

248 The analyses in the study also suggest that higher-income  
 249 countries may have a higher likelihood of being funded  
 250 and producing higher-impact articles in terms of

251 citations (Figure 7). This could be due to higher-income countries having greater access to resources and  
 252 funding, which could contribute to the production of higher-impact articles. Additionally, the research

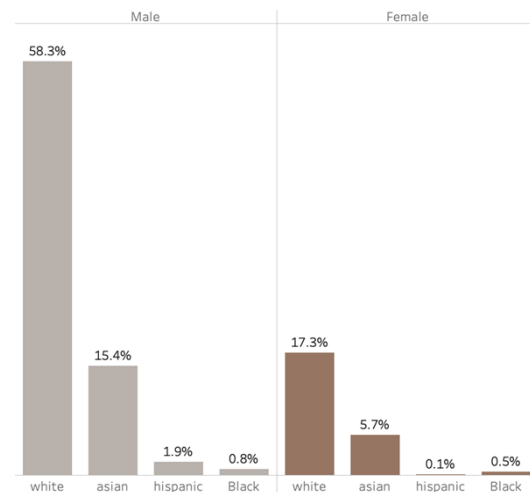

Figure 6. Distribution of citations among last authors based on gender and ethnicity - AI fairness community in Healthcare

253 culture, infrastructure, and collaboration networks in higher-income countries may also play a role in  
254 producing impactful research. However, it is also important to consider the potential biases that may be  
255 present, such as language bias, publication bias, citation practices and funding. Recent scholarship on  
256 citational practices and politics draws attention to the ways that structural inequities among authors are  
257 reflected in citation practices, noting that scholars can take an active role in upending these hierarchies  
258 through an intentional transformation in their own citational practices [10, 11]. These biases could impact  
259 the analysis and interpretation of the results, and their access to funding, leading them to make less  
260 impactful articles.

261  
262 Articles were also evaluated according to how often they  
263 get cited, in which year of publication was another  
264 variable in classification, which showed that more recent  
265 (closer to 2022) articles were most likely to be cited.

#### 266 OLS Regression Results (Citations)

267  
268  
269 Regression analyses revealed that the percentage of  
270 female authors, percentage of white authors, race of  
271 authors, gender of authors, and the number of authors is  
272 not correlated with the likelihood of being cited.

273 Publication year was the only factor affecting to be  
274 cited.

#### 275 276 OLS Regression Results (Funding)

277  
278 Regression analyses revealed that the following parameters: percentage of female authors, percentage of  
279 white authors, gender of first and last authors, and first and last authors, whether white or non-white, do  
280 not affect funding. The number of authors and years of publications does not affect being funded.

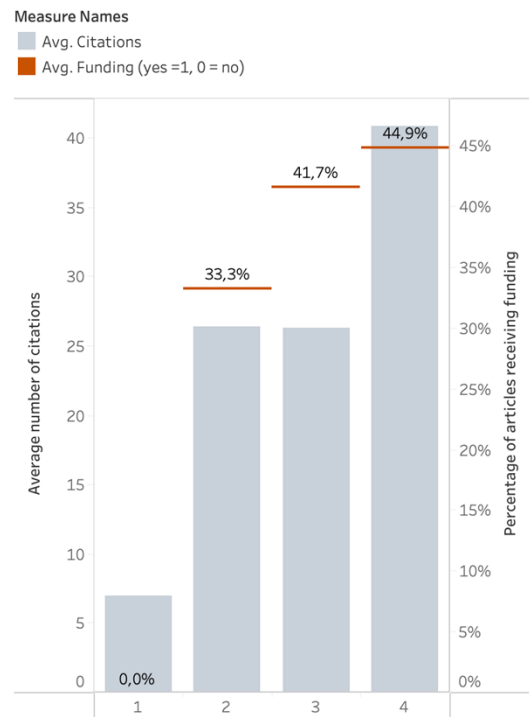

**Figure 7.** Distribution of citations among for last authors' income level - AI fairness community in Healthcare

281

282 Predictor factors of Citation and Funding

283

284 Regression analyses revealed similar trends for citation and funding. The percentage of female authors,  
285 the percentage of white authors, and the gender and race of the first and last authors did not have a  
286 statistically significant effect on whether a paper was cited or whether it was funded. Instead, publication  
287 year was the only factor with a statistically significant effect on the number of citations a paper received.

288

## 289 **DISCUSSION**

290

291 The performed bibliometric study highlights the relative homogeneity of the authors of the AI fairness  
292 community, most notably seen in the distribution of gender, ethnicity, and countries of authorship. Male  
293 authorship, particularly that of white males, may be associated with higher-impact articles published in  
294 high-impact journals.

295

296 There is an overrepresentation of white, male authors, particularly in the first and last author role. 60% of  
297 the total number of authors were male, and the same proportion continued within the distribution of first  
298 authors and increased to 69% when looking at last authors as shown by Figure 1. Moreover, papers that  
299 had more male authorship, particularly that of white males, had a higher impact factor via the number of  
300 citations, as demonstrated by Figures 5 and 6. Articles with male last authors accounted for a substantial  
301 76.4% of all citations. White male last authors alone were responsible for 58.3% of the total citations for  
302 all articles.

303

304 The increasing numbers of health disparities in underrepresented ethnic groups, and the  
305 underrepresentation of minority ethnic groups and women in academia has been well documented.  
306 Multiple studies and reports have addressed this trend and this study shows that it persists within the AI  
307 fairness community as well [12-17]. Women are less likely to be first or last authors and are less likely to  
308 be cited compared to male authors. This trend aligns with the findings of [12-14], which shows that there



309 is a significant disparity in gender and ethnicity in critical care medicine, particularly with regards to  
310 women being underrepresented in leadership roles, which can limit their opportunities for publication and  
311 recognition [16]. However, from the data, there was a slight indication that papers with female last authors  
312 were more likely to get a funding source, compared to the male counterpart, counterbalancing the notion  
313 of male predominance [18]. This finding highlights the positive impact that could be achieved, when  
314 equality measures are implemented by regulatory institutions in AI research within healthcare.

315

316 The analysis also shows that higher-income countries are more likely to produce higher-impact articles,  
317 most likely a reflection of the amount of funding received as demonstrated by Figure 7. Massuda et al  
318 show that underfunding a survey can lead to a significant reduction in quality, perpetuating the status quo  
319 [19]. This difference in funding perpetuates the current power dynamic where countries from underfunded  
320 institutions in low- and middle-income countries are less likely to produce high-quality research that is  
321 widely cited and well-regarded. Promoting research from underrepresented groups and communities is  
322 essential to promoting fairness and equity in research.

323

324 Possible actions to ensure proper representation include supporting research capacity development in  
325 lower-income and lower-middle-income countries and promoting research conducted by researchers of  
326 underrepresented gender identities and ethnic minorities. By supporting this development, the global  
327 research landscape becomes more inclusive. This in turn helps to advance and strengthen medical  
328 knowledge and promote social justice within the scientific community. In addition, promoting collaboration  
329 and cooperation between researchers from diverse backgrounds and locations can also lead to more  
330 innovative and impactful research [20].

331

332 Another way to promote diversity and inclusion in research is to establish guidelines for diversifying the  
333 composition of authors based on their ethnicity and sex. Providing formal training on equity issues and  
334 the importance of diversity in the research process can help educate researchers and promote greater  
335 awareness and understanding of these issues. This can be incorporated into the syllabi of academic  
336 institutions to ensure that the next generation of researchers is equipped with the knowledge and skills

337 necessary to promote diversity and inclusion in their work. Diversity should be highlighted in published  
338 work and working groups. Disclosing authors' nationalities, races, ethnicities, and sexes can promote  
339 diversity and inclusivity. Inclusivity also begins at the door. Institutions should develop initiatives that can  
340 help to attract more diverse scholars through transforming institutional cultures and priorities, as well as  
341 recruitment, hiring, and promotion policies.

342

343 In addition to promoting diversity in the composition of working groups and authorship of published work,  
344 it is also important to consider diversity in the content of the work, for example, including diverse  
345 perspectives and experiences in the research or addressing issues that affect diverse communities.

346 AlShebli et al. found that ethnic diversity had the strongest correlation with scientific impact [20].

347 Recruiters should always strive to encourage and promote ethnic diversity, be it by recruiting candidates  
348 who complement the ethnic composition of existing members, or by recruiting candidates with proven  
349 track records in collaborating with people of diverse ethnic backgrounds.

350

351 Researchers should seek to understand their own group composition and how it should coincide with the  
352 communities which the research may impact. Representativeness and collaboration with communities can  
353 result in better science [21] and as such, greater understanding and awareness of these groups'  
354 challenges and issues can ultimately lead to more effective solutions. It is also worth noting that groups  
355 with higher cognitive diversity are often more effective at complex problem-solving and can help to reduce  
356 biased judgment in strategic decision-making [21-22].

357

358 Journals, editors, reviewers, and grantors can mandate that the author teams disclose their goals for  
359 achieving such diversity. Doing so would promote transparency and accountability and encourage  
360 authors to prioritize diversity and inclusion in their research. The National Institutes of Health (NIH)  
361 actively promotes diversity within the scientific community by encouraging conference grant applicants to  
362 include plans to enhance diversity in the selection of organizing committees, speakers, other invited  
363 participants and attendees [23]. These plans will be assessed during the scientific and technical merit  
364 review of the application and will be considered in the overall impact score. The underrepresented groups

365 include individuals from nationally underrepresented racial and ethnic groups, individuals with disabilities,  
366 individuals from disadvantaged backgrounds, and women. Encouraging authors to highlight their efforts to  
367 promote diversity in their groups can raise awareness of the importance of diversity and inclusion in the  
368 scientific field and promoting diversity and inclusion in all aspects of research can ensure that the work is  
369 more representative and relevant to a broader range of people, ultimately leading to more equitable and  
370 effective outcomes.

371

### 372 Limitations

373 Although several significant publications resulted from PubMed and Google Scholar searches, some were  
374 excluded. We used the third-party package PyPaperBot when selecting papers resulting from Google  
375 Scholar searchers which enabled us to extract 497 papers out of potentially hundreds of thousands. A  
376 large portion of the articles was removed from further analysis through manual vetting. However, third-  
377 party APIs are the only ways to parse through Google Scholar results. PyPaperBot was used, but a  
378 limitation of all the APIs seen is that they can only fetch the first 1,000 results, even if there are more. The  
379 extent of the literature is more vast than what we were able to extract, and it is crucial to scale up this  
380 analysis to capture more of the literature base in the future.

381

382 While manually vetting and extracting the authors' demographic information, information may differ from  
383 the authors' preferred identities, specifically for gender, race and countries of origin, as race, ethnicity,  
384 and gender are social constructs that can vary significantly depending on their socio-political context, and  
385 it may not accurately reflect the author's personal identity. Our analysis may have mischaracterized this  
386 vital information if their identities were not clearly stated on the internet. The use of predetermined  
387 categories for race and ethnicity made it particularly difficult to capture authors who may identify as multi-  
388 racial, or as belonging to several of these categories. It is also important to recognize that some people  
389 may not have the freedom or opportunity to publicly express how they identify. Similarly, assessments of  
390 whether an individual identified as non-binary were particularly challenging if not explicitly stated, and as  
391 such were not included in this study.

392 Moving forward, it will be important to develop better methodologies for representing a diverse range of  
393 possible identifications in order to better study questions of diversity, and a preferred methodology would  
394 involve interviewing each author in order to accurately record their nationality, self-identified race, and  
395 sex, as well as expanding the categories, however due to the scale of the study, it was not possible to  
396 obtain self-identified information in all cases. Systemic changes that allow for proper expression of  
397 identification are also necessary. Despite the presence of some inaccuracy within the data, as a necessity  
398 to perform statistical analysis, the overall trends revealed within this data are clear.

399

#### 400 **Conclusion**

401

402 As progress is made in both AI and healthcare, equity and inclusivity must be prioritized as it can lead to  
403 more innovative and impactful research, and a science that works for all. Thus the composition of the AI  
404 fairness research community is of the utmost importance as whether AI will be a tool which only those  
405 who meet certain criteria can benefit from or a platform that serves all communities no matter their  
406 demographics, depends heavily on those who have a say in its design.

## REFERENCES

- [1] Panch T, Mattie H, Atun R. Artificial intelligence and algorithmic bias: implications for health systems. *J Glob Health*. 2019 Dec;9(2):010318. doi: 10.7189/jogh.09.020318
- [2] European Commission, Directorate-General for Communications Networks, Content and Technology, (2019). Ethics guidelines for trustworthy AI, Publications Office. <https://data.europa.eu/doi/10.2759/346720>
- [3] ProPublica. (2008) ProPublica - Journalism in the Public Interest. United States. [Web Archive] Retrieved from the Library of Congress, <https://www.loc.gov/item/lcwaN0007149/>.
- [4] Harding, Sandra G. 2015. *Objectivity and Diversity: Another Logic of Scientific Research*. Chicago: The University of Chicago Press.
- [5] The World Bank Group. GDP per capita (current US\$) 2022.
- [6] Rutgers Graduate School of Education. LIST OF MINORITY SERVING INSTITUTIONS. 2021.
- [7] The Python Package Index. PyPaperBot 1.2.2 2022. <https://pypi.org/project/PyPaperBot/> (accessed December 27, 2022).
- [8] Hunter JD. Matplotlib: A 2D Graphics Environment. *Comput Sci Eng* 2007;9:90–5. <https://doi.org/10.1109/MCSE.2007.55>.
- [9] Waskom M. seaborn: statistical data visualization. *J Open Source Softw* 2021;6:3021. <https://doi.org/10.21105/joss.03021>.
- [10] Ahmed, Sara. 2012. *On Being Included: Racism and Diversity in Institutional Life*. Durham: Duke University Press.
- [11] Liboiron, Max, and Rui Li. "Citational Politics in Tight Places." Civic Laboratory for Environmental Action Research. <https://civiclaboratory.nl/2022/03/02/citational-politics-in-tight-places/>
- [12] Vincent, JL., Juffermans, N.P., Burns, K.E.A. et al. Addressing gender imbalance in intensive care. *Crit Care* 25, 147 (2021). <https://doi.org/10.1186/s13054-021-03569-7>
- [13] Goode, C. A., & Landefeld, T. (2018). The Lack of Diversity in Healthcare: Causes, Consequences, and Solutions. *Journal of Best Practices in Health Professions Diversity*, 11(2), 73–95. <https://www.jstor.org/stable/26894210>
- [14] Salsberg E, Richwine C, Westergaard S, et al. Estimation and Comparison of Current and Future Racial/Ethnic Representation in the US Health Care Workforce. *JAMA Netw Open*. 2021;4(3):e213789. doi:10.1001/jamanetworkopen.2021.3789
- [15] Chatterjee P, Werner RM. Gender Disparity in Citations in High-Impact Journal Articles. *JAMA Netw Open* 2021;4:e2114509. <https://doi.org/10.1001/jamanetworkopen.2021.14509>.
- [16] Filardo G, da Graca B, Sass DM, Pollock BD, Smith EB, Martinez MA-M. Trends and comparison of female first authorship in high impact medical journals: observational study (1994-2014). *BMJ* 2016;i847. <https://doi.org/10.1136/bmj.i847>.
- [17] Valantine HA, Collins FS. National Institutes of Health addresses the science of diversity. *Proc Natl Acad Sci U S A* 2015;112:12240–2. <https://doi.org/10.1073/pnas.1515612112>
- [18] Sela N, Anderson BL, Moulton AM, Hoffman AL. Gender Differences in Authorship Among Transplant Physicians: Are We Bridging the Gap? *Journal of Surgical Research* 2021;259:271–5. <https://doi.org/10.1016/j.jss.2020.09.037>.
- [19] Massuda A, Hone T, Leles FAG, de Castro MC, Atun R. The Brazilian health system at crossroads: progress, crisis and resilience. *BMJ Glob Health* 2018;3:e000829. <https://doi.org/10.1136/bmjgh-2018-000829>.
- [20] AIShebli BK, Rahwan T, Woon WL. The preeminence of ethnic diversity in scientific collaboration. *Nat Commun* 2018;9:5163. <https://doi.org/10.1038/s41467-018-07634-8>.
- [21] Aminpour P, Schwermer H, Gray S. Do social identity and cognitive diversity correlate in environmental stakeholders? A novel approach to measuring cognitive distance within and between groups. *PLoS One* 2021;16:e0244907. <https://doi.org/10.1371/journal.pone.0244907>.

- [22] Meissner P, Wulf T. The effect of cognitive diversity on the illusion of control bias in strategic decisions: An experimental investigation. *European Management Journal* 2017;35:430–9. <https://doi.org/10.1016/j.emj.2016.12.004>.
- [23] Office of The Director, National Institutes of Health (OD). (2021, January 22). *Not-OD-21-053: Updated guidelines for enhancing diversity and creating safe environments in conferences supported by NIH grants and cooperative agreements*. National Institutes of Health. Retrieved February 26, 2023, from <https://grants.nih.gov/grants/guide/notice-files/NOT-OD-21-053.html>

## APPENDIX

### Search String:

("Artificial Intelligence"[mesh] OR "Pattern Recognition, Automated"[mesh] OR "Data Mining"[Mesh] OR artificial intelligence[tiab] OR computational intelligence[tiab] OR machine intelligence[tiab] OR intelligent automation[tiab] OR intelligent system\*[tiab] OR machine learning[tiab] OR deep learning[tiab] OR deep network\*[tiab] OR supervised learning[tiab] OR natural language process\*[tiab] OR neural net\*[tiab] OR perceptron\*[tiab] OR algorithmic decision making[tiab] OR predictive care tool\*[tiab] OR predictive medicin[tiab] OR predictive model\*[tiab] OR data mining[tiab]) AND ("Health Equity"[mesh] OR "Social Discrimination"[Mesh] OR "Healthcare Disparities"[mesh] OR fairness[tiab] OR egalitarian\*[tiab] OR distributive justice[tiab] OR ((inequalit\*[tiab] OR disparit\*[tiab] OR inequit\*[tiab] OR equity[tiab] OR equality[tiab] OR underrepresent\*[tiab]) AND (health\*[tiab] OR healthcare[tiab] OR racial[tiab] OR ethnic[tiab] OR sex[tiab] OR sexual[tiab] OR socioeconomic[tiab] OR economic[tiab]))) \*\*mesh terms removed for the Google Scholar searches.

|                 | First author | Last Author | Other Authors | Total |
|-----------------|--------------|-------------|---------------|-------|
| <b>Gender</b>   |              |             |               |       |
| Male            | 220 (58.8%)  | 243 (68.8%) | 727           | 1190  |
| Female          | 155 (41.3%)  | 110 (31.2%) | 529           | 794   |
| <b>Race</b>     |              |             |               |       |
| White           | 234 (62.4%)  | 234 (66.3%) | 802           | 1270  |
| Non - White     | 141 (37.6%)  | 119 (33.7%) | 436           | 696   |
| <i>Hispanic</i> | 14 (3.7%)    | 11 (3.1%)   | 49            | 74    |
| <i>Asian</i>    | 103 (27.5%)  | 96 (27.2%)  | 334           | 533   |
| <i>Black</i>    | 24 (6.4%)    | 12 (3.4%)   | 53            | 89    |

**Table 1.** Distrubtion of authors across Gender and Race– AI fairness community in Healthcare

Fig x1. Citation OLS Results.

| Variable | Coefficient | Standard Error | t | P> t | [0.025 0.975] |
|----------|-------------|----------------|---|------|---------------|
|----------|-------------|----------------|---|------|---------------|

|                       |          |        |        |       |                  |
|-----------------------|----------|--------|--------|-------|------------------|
| % Female              | 7.1467   | 16.706 | 0.428  | 0.669 | [-25.762 40.056] |
| % White               | -16.9713 | 19.172 | -0.885 | 0.377 | [-54.738 20.795] |
| First author (white)  | 4.1721   | 11.288 | 0.370  | 0.712 | [-18.065 26.409] |
| First author (female) | -7.9310  | 8.206  | -0.966 | 0.335 | [-24.096 8.234]  |
| Last author (white)   | -0.8426  | 10.010 | -0.084 | 0.933 | [-20.560 18.875] |
| Last author (female)  | -6.1935  | 8.299  | -0.746 | 0.456 | [-22.542 10.154] |
| # of authors          | 1.7810   | 0.821  | 2.170  | 0.031 | [0.164 3.398]    |
| Year                  | 0.0133   | 0.004  | 3.044  | 0.003 | [0.005 0.022]    |

Fig x2. Citation Logit Regression Results

| Variable              | Coefficient | Standard Error | z      | P> z  | [0.025 0.975]     |
|-----------------------|-------------|----------------|--------|-------|-------------------|
| % Female              | 0.0804      | 0.656          | 0.122  | 0.903 | [-1.206 1.367]    |
| % White               | 0.2175      | 0.751          | 0.290  | 0.772 | [-1.254 1.689]    |
| First author (white)  | 0.1087      | 0.442          | 0.246  | 0.806 | [-0.758 0.975]    |
| First author (female) | -0.2146     | 0.322          | -0.666 | 0.506 | [-0.846 0.417]    |
| Last author (white)   | 0.2955      | 0.391          | 0.756  | 0.450 | [-0.471 1.062]    |
| Last author (female)  | 0.5383      | 0.327          | 1.647  | 0.099 | [-0.102 1.179]    |
| # of authors          | 0.0031      | 0.032          | 0.098  | 0.922 | [-0.060 0.066]    |
| Year                  | -0.0003     | 0.000          | -1.538 | 0.124 | [-0.001 7.32e-05] |

|             | First author |           |      |        |
|-------------|--------------|-----------|------|--------|
|             | White        | Non-White | Male | Female |
| # of papers | 146          | 102       | 141  | 107    |

|          |      |      |      |      |
|----------|------|------|------|------|
| % Funded | .521 | .441 | .503 | .467 |
| P-value  | .220 |      | .573 |      |

|             | Last author |           |      |        |
|-------------|-------------|-----------|------|--------|
|             | White       | Non-White | Male | Female |
| # of papers | 148         | 100       | 164  | 75     |
| % Funded    | .534        | .420      | .470 | .572   |
| P-value     | .0792       |           | .137 |        |

Updates Visuals:

<https://public.tableau.com/app/profile/tiffany.chua/viz/AlintheHealthcareFairnessCommunity/SpatialDash>
